1 **CLASSIFICATION**

2 Biological Sciences: Applied Biological Sciences

3

4 **TITLE**

5 Serial sarcomere number is substantially decreased within the paretic biceps brachii in  
6 individuals with chronic hemiparetic stroke

7

8 **AUTHORS & AFFILIATIONS:**

9 <sup>1,4,5</sup>Amy N. Adkins, <sup>1,2,3</sup>Julius P.A. Dewald, <sup>1,2,6</sup>Lindsay Garmirian, <sup>1,2,7</sup>Christa M. Nelson,  
10 <sup>1,2,3,4,5</sup>Wendy M. Murray\*

11 <sup>1</sup>Department of Biomedical Engineering, Northwestern University, Evanston, IL, 60208

12 <sup>2</sup>Department of Physical Therapy and Human Movement Sciences, Northwestern University  
13 Feinberg School of Medicine, Chicago, IL, 60610

14 <sup>3</sup>Department of Physical Medicine & Rehabilitation, Northwestern University Feinberg School of  
15 Medicine, Chicago, IL, 60610

16 <sup>4</sup>Shirley Ryan AbilityLab (formerly the RIC), Chicago, IL, 60610

17 <sup>5</sup>Edward Hines, Jr. VA Hospital, Hines, IL, 60141

18 <sup>6</sup>Department of Health, Human Function & Rehabilitation Sciences, George Washington  
19 University, Washington, DC, 20052 (Current Address)

20 <sup>7</sup>Department of Physical Therapy and Rehabilitation Science, University of Maryland School of  
21 Medicine, Baltimore, MD, 21201(Current Address)

22 \* [w-murray@northwestern.edu](mailto:w-murray@northwestern.edu) | (312) 238-6965 | 20<sup>th</sup> Floor AbilityLab, Shirley Ryan AbilityLab,  
23 Chicago, IL, 60610

24 **KEYWORDS**

25 Muscle, Stroke, Sarcomere, Fascicle, Imaging

26 **ABSTRACT**

27           A muscle's structure, or architecture, is indicative of its function and is plastic; changes  
28 in input to or use of the muscle alter its architecture. Stroke-induced neural deficits substantially  
29 alter both input to and usage of individual muscles. Here, we combined novel *in vivo* imaging  
30 methods (second harmonic generation microendoscopy, extended field-of-view ultrasound, and  
31 fat-suppression MRI) to quantify functionally meaningful muscle architecture parameters in the  
32 biceps brachii of both limbs of individuals with chronic hemiparetic stroke and in age-matched,  
33 unimpaired controls. Specifically, serial sarcomere number and physiological cross-sectional  
34 area were calculated from data collected at three anatomical scales: sarcomere length, fascicle  
35 length, and muscle volume. Our data indicate that the paretic biceps brachii had ~8,500 fewer  
36 serial sarcomeres compared to the contralateral limb ( $p=0.0044$ ). In the single joint posture  
37 tested, the decreased serial sarcomere number was manifested by significantly shorter fascicles  
38 (10.7cm vs 13.6cm;  $p<0.0001$ ) without significant differences in sarcomere lengths ( $3.58\mu\text{m}$  vs.  
39  $3.54\mu\text{m}$ ;  $p=0.6787$ ) in the paretic compared to the contralateral biceps. No interlimb differences  
40 were observed in unimpaired controls, suggesting we observed muscle adaptations associated  
41 with stroke rather than natural interlimb variability. This study provides the first direct evidence  
42 of the loss of serial sarcomeres in human muscle, observed in a population with neural  
43 impairments that lead to disuse and chronically place the affected muscle at a shortened  
44 position. This adaptation is consistent with functional consequences (increased passive  
45 resistance to elbow extension) that would amplify already problematic, neurally driven motor  
46 impairments.

47

48 **SIGNIFICANCE STATEMENT**

49 Serial sarcomere number determines a muscle's length during maximum force production and  
50 its available length range for active force generation. Skeletal muscle length adapts to functional

51 demands; for example, animal studies demonstrate that chronically shortened muscles  
52 decrease length by losing serial sarcomeres. This phenomenon has never been demonstrated  
53 in humans. Integrating multi-scale imaging techniques, including two photon microendoscopy,  
54 an innovative advance from traditional, invasive measurement methods at the sarcomere scale,  
55 we establish that chronic impairments that place a muscle in a shortened position are  
56 associated with the loss of serial sarcomeres in humans. Understanding how muscle adapts  
57 following impairment is critical to the design of more effective clinical interventions to mitigate  
58 such adaptations and to improve function following motor impairments.

59

## 60 **INTRODUCTION**

61 Three-fourths of the nearly 7 million stroke survivors currently living in the United States  
62 report substantial motor impairments that limit their independence in tasks of everyday life(1, 2).  
63 Damage to the corticofugal motor pathways and the resulting reliance on indirect  
64 corticoreticulospinal pathways following stroke alter neuronal input to contralesional muscles(3-  
65 6). Such changes include decreased voluntary neural drive (weakness or paresis)(7, 8) and  
66 increased involuntary neural drive (hypertonicity), causing the inability to fully activate and fully  
67 relax the muscle, respectively. Further, abnormal muscle coactivation patterns(9) also arise  
68 from the altered neuronal drive, commonly leading to abnormal limb synergies(10) or a loss of  
69 independent joint control(9, 11). For example, in the upper limb, the flexion synergy presents  
70 when the individual attempts to abduct their shoulder but involuntarily and concomitantly flexes  
71 all of their distal joints (elbow, wrist, and fingers)(9, 12). The flexion synergy limits the ability to  
72 combine shoulder abduction and extension of the limb, as needed to use the arm and hand to  
73 reach and acquire an object at a distance from the body. Thus, although stroke is primarily an  
74 injury of the brain, stroke-induced neural deficits substantially alter input to and use of the  
75 contralesional upper limb.

76           Skeletal muscle is a plastic tissue; changes to both the stimulus it receives and how it is  
77 used can alter its functional capacity (e.g.(13-19)). A muscle’s function, its ability to contract and  
78 produce force, can be delineated via its architecture(20-23). Specifically, optimal fascicle length  
79 (OFL) is the fascicle length at which the muscle generates its maximum force. OFL is a  
80 measure of the number of sarcomeres in series in the muscle, so it also provides a measure of  
81 the absolute range of lengths over which the muscle can actively generate force(21, 24).  
82 Physiological cross-sectional area (PCSA) is a correlate of the maximum isometric force a  
83 muscle can produce given maximum activation(25). These two critical muscle architectural  
84 features are calculated from more primary measures of a muscle’s structural anatomy that occur  
85 across different scales, including muscle volume, fascicle length, pennation angle (in pennate  
86 muscle), and sarcomere length (see Methods, Eqs. 4 and 5)(24, 26). Quantifying the adaptation  
87 of these two parameters to changes in use and stimulus can provide insight into the functional  
88 implications of such changes. For example, a series of classic studies in animal models  
89 demonstrate that when limbs were immobilized for an extended time, muscles immobilized at a  
90 joint angle that shortened muscle-tendon lengths (i.e., with origin-to-insertion distances that  
91 were decreased compared to resting length) lost serial sarcomeres (i.e., adapted such that OFL  
92 was shorter)(18, 27-29). Conversely, when immobilized at a joint posture that lengthened  
93 muscles, sarcomeres were added in series. These fundamental studies suggest that when *in*  
94 *vivo* length is chronically altered, a muscle’s architecture changes in a way that maximizes its  
95 function at the new length. Specifically, in the immobilization studies, the muscle’s length “re-  
96 optimized” so OFL (the length at which the muscle generates its maximum force) occurred at  
97 the joint angle of immobilization.

98           Despite these important studies, it is unclear the extent to which this mechanism is  
99 expressed, *in vivo*, in human muscle. For example, at this point, only a single published study  
100 has calculated serial sarcomere number (i.e., measured both sarcomere length and fascicle  
101 length *in vivo*) under conditions in which a human muscle has chronically been placed at a

102 shortened position<sup>32</sup>. In this case, the calf muscles in children with cerebral palsy with equinus  
103 contractures (functionally shortened muscle-tendon units that are more resistant to stretch(30,  
104 31)) severe enough to require surgical intervention did not “re-optimize” to the shorter muscle  
105 lengths imposed by the participants’ chronically plantarflexed joint posture. Rather, the soleus  
106 muscles in these children had sarcomeres substantially longer (4.07 $\mu$ m(32)) than optimal length  
107 (2.70 $\mu$ m(33)). Unfortunately, identical measurements could not be collected in a control  
108 population because sarcomere length could not be measured in children who were not  
109 undergoing surgery. Sarcomere length measurements in living human subjects have  
110 traditionally been limited to biopsy or intraoperative studies, (i.e. during distraction surgeries for  
111 limb discrepancy(13), tendon transfer surgeries(34, 35), or muscle lengthening in children with  
112 cerebral palsy(30)) and only recently have become measurable via minimally or non-invasive  
113 techniques(36, 37). As a result, the authors estimated serial sarcomere number for control  
114 participants by combining fascicle length measures obtained from typically developing children  
115 via ultrasound with sarcomere lengths measured from adult cadavers via dissection. Based on  
116 these methods, the authors concluded the soleus in the children with CP had fewer sarcomeres  
117 in series than typically developing muscle(32). This pediatric study suggested that, instead of re-  
118 optimizing so that OFL occurred at the chronically plantarflexed ankle angle, the shortened  
119 muscle shifted to much longer sarcomere lengths, at which active force-generating capabilities  
120 are weaker and passive forces are greater.

121         Stroke-induced neural deficits lead to decreased use and a chronically more flexed  
122 resting posture of the paretic upper limb. Given the muscle adaptation observed following  
123 immobilization in animal models, as well as a general assumption that these type of muscle  
124 adaptations do occur in humans with severe neural impairments and may result in muscles that  
125 are both structurally weaker and stiffer, there is concern about functional consequences of  
126 muscle adaptation following stroke. Thus, several studies have sought to directly quantify *in vivo*  
127 muscle structure in this cohort. In general, *in vivo* medical imaging has provided strong evidence

128 that many muscle anatomical structural parameters are different in the paretic limb compared to  
129 the contralateral limb. Specifically, shorter fascicles(38), as well as smaller pennation  
130 angles(39), muscle masses(40), volumes(41, 42), and anatomical cross-sectional areas (the  
131 area of muscle perpendicular to the line of action of the external tendons(43)) have been  
132 demonstrated in numerous thigh and shank muscles(41, 44). Similarly, in the upper limb,  
133 shorter fascicles(45, 46) and smaller muscle volumes(47) have been reported in various paretic  
134 muscles as compared to the contralateral side.

135         The primary weakness of existing studies that demonstrate differences in anatomical  
136 parameters in paretic muscles in chronic stroke is that none also simultaneously measured  
137 sarcomere length. Neither OFL nor PCSA is calculable in any existing study that describes  
138 muscle structure following chronic stroke because they do not report the corresponding  
139 measures of both a muscle's sarcomere and fascicle lengths. Thus, insight into how the  
140 observed structural differences relate to muscle function in the paretic limb is limited. For  
141 example, shorter fascicles in the paretic limb relative to the contralateral limb have been widely  
142 demonstrated(38, 45, 46). One explanation of this observation in the elbow flexors could be that  
143 they experience conditions similar to muscle immobilization at shortened muscle-tendon  
144 lengths; the paretic upper limb is generally used much less than the non-paretic limb and it rests  
145 in a more flexed elbow posture(48). Thus, similar to immobilization studies in animal models  
146 (i.e.(18, 27, 29)), shorter fascicles in the paretic elbow flexors could result from a loss of  
147 sarcomeres in series. Functionally, this adaptation would indicate a decrease in the absolute  
148 range of lengths over which the muscle can generate active force(21). In addition, the animal  
149 studies demonstrated that muscles that lost sarcomeres in series exhibited a shift in the onset of  
150 passive force development to shorter lengths; the muscles that lost sarcomeres in series were  
151 also described as less "extensible"(29). However, without a concomitant measure of the length  
152 of the muscle's sarcomeres, the possibility that fascicle lengths measured in paretic muscle are  
153 shorter because there are fewer sarcomeres in series cannot be distinguished from the

154 possibility that the paretic muscle has the same number of sarcomeres in series as in the  
155 contralateral limb, but its sarcomeres have adapted by shifting to shorter lengths. In this case,  
156 the paretic muscle would be capable of generating active force over the same range of lengths,  
157 but the muscle would operate over shorter sarcomere lengths throughout the joint's range of  
158 motion. Based on basic muscle physiology, we would expect a muscle operating at shorter  
159 sarcomere lengths to generate smaller passive forces throughout the joint's range of  
160 motion(43). A single study has reported *in vivo* measures of biceps brachii sarcomere lengths  
161 following chronic hemiparetic stroke (fascicle lengths were not measured); 2 of 4 stroke  
162 participants had longer sarcomeres in the paretic biceps compared to the non-paretic side, and  
163 2 had shorter sarcomeres(49). Thus, the implications for OFL, the range of lengths over which  
164 the muscle can generate active force, and the passive forces the muscle produces over the  
165 joint's range of motion, remain unclear. These distinct possibilities for sarcomere adaptation  
166 would also have different effects on maximum isometric force capacity. While a decrease in  
167 muscle volume is regularly reported in paretic limbs(41, 47), PCSA is the architectural correlate  
168 of force-generating capacity, and it is calculated using the ratio between muscle volume and  
169 OFL. Critically, stroke alters both neural input(5-7) to and use(8, 9, 11, 12) of the paretic limb.  
170 Thus, it is also possible that paretic muscle adapts in an unexpected manner post-stroke;  
171 animal models of immobilization limited the use of the limb and altered muscle length but did not  
172 involve neural injury.

173         In this study, we quantify multiscale muscle parameter differences, *in vivo*, in the biceps  
174 brachii of the paretic and contralateral limbs of individuals with chronic hemiparetic stroke and in  
175 both limbs of a group of age-matched individuals with no history of musculoskeletal or  
176 neurological diseases or injuries to the upper limb. Specifically, sarcomere length, fascicle  
177 length, and muscle volume are measured from images obtained using second harmonic  
178 generation microendoscopy, extended field-of-view ultrasound, and fat suppression magnetic  
179 resonance imaging, respectively. Our most prominent finding was that the paretic biceps of

180 individuals with chronic hemiparetic stroke has fewer sarcomeres in series (i.e., shorter OFL)  
181 compared to the contralateral muscle. In the limb posture we evaluated, this result was  
182 manifested by systematically shorter fascicles in the paretic muscle without significantly different  
183 sarcomere lengths from the non-paretic, contralateral biceps. Our data provide the first direct  
184 evidence of muscle adaptation involving the loss of serial sarcomeres in living human subjects  
185 and is observed in a population with neural impairments that chronically place the affected  
186 muscle at a shortened position. This muscle architectural difference post chronic hemiparetic  
187 stroke is consistent with functional consequences that would amplify the already problematic  
188 neural driven motor impairments (i.e. the ability to reach away from the body to grab an object).

189

## 190 **RESULTS**

### 191 **SSN, Fascicle length, and Sarcomere Length**

192 Relative to the contralateral, non-paretic limb, the paretic biceps brachii of individuals  
193 with chronic hemiparetic stroke had fewer sarcomeres in series; this inter-limb difference was  
194 not observed in participants without stroke. Specifically, there was a statistically significant  
195 difference in overall SSN between paretic and non-paretic limbs (**p = 0.0044**) with an estimated  
196 mean SSN in the paretic muscle of  $30,152 \pm 2,163$  (95% CI, 25,038 to 35,267) compared to  
197  $38,697 \pm 2,162$  (95% CI, 33,584 to 43,810) serial sarcomeres in the non-paretic muscle (Fig 1).  
198 We also observed significantly shorter biceps fascicles (**p < 0.0001**) in these participants'  
199 paretic limbs; mean fascicle lengths on the paretic side were shorter ( $10.66 \pm 0.61$  cm; 95% CI,  
200 9.46 to 11.85 cm) than non-paretic fascicle lengths ( $13.59 \pm 0.61$  cm; 95% CI, 12.40 to 14.79  
201 cm) in the single joint posture we tested (Fig. 2A). There was no significant difference in  
202 sarcomere length in this posture ( $p = 0.6787$ ; paretic  $3.58 \pm 0.08$   $\mu\text{m}$  95% CI, 3.42 to 3.73  $\mu\text{m}$ ;  
203 non-paretic  $3.54 \pm 0.08$   $\mu\text{m}$  95% CI, 3.39 to 3.70  $\mu\text{m}$ ) (Fig. 2B). For the individuals who did not  
204 have a stroke, there were no observed interlimb differences in SSN ( $p = 0.2463$ ; dominant  
205  $40,102 \pm 1,451$  95% CI, 37,253 to 42,951; non-dominant  $39,545 \pm 1,453$  95% CI, 36,691 to



206 42,398), fascicle length ( $p = 0.0790$ ; dominant  $14.32 \pm 0.27$  cm 95% CI, 13.78 to 14.86 cm;  
207 non-dominant  $14.11 \pm 0.27$  cm 95% CI, 13.57 to 14.65 cm), or sarcomere length ( $p = 0.9423$ ;  
208 dominant  $3.58 \pm 0.07$   $\mu\text{m}$  95% CI, 3.44 to 3.72  $\mu\text{m}$ ; non-dominant  $3.59 \pm 0.07$   $\mu\text{m}$  95% CI, 3.45  
209 to 3.73  $\mu\text{m}$ ) (Fig 2-3). The relationship between Fugl-Meyer Assessment (FMA) and percent  
210 difference in fascicle length yielded a modest linear relationship ( $R^2 = 0.5953$ ) which was  
211 significant ( $p = \mathbf{0.0249}$ ) (Fig. 3A); the relationship between FMA and percent difference in SSN  
212 was weaker ( $R^2 = 0.4676$ ;  $p = 0.0615$ ) (Fig. 3B).

213

### 214 **PCSA and Muscle Volume**

215 There was a substantial difference in muscle volume and a modest difference in PCSA  
216 in the paretic biceps brachii in participants with chronic hemiparetic stroke as compared to the  
217 contralateral limb. Muscle volume was significantly smaller on the paretic side ( $p = \mathbf{0.0127}$ ;  
218 paretic  $105 \pm 21$   $\text{cm}^3$  95% CI, 55 to 154  $\text{cm}^3$ ; non-paretic  $148 \pm 21$   $\text{cm}^3$  95% CI, 99 to 197  $\text{cm}^3$ );  
219 however, one stroke participant had a larger muscle volume on the paretic side compared to the  
220 non-paretic side (Fig. 4A). This individual also had the smallest volume among all participants'  
221 non-paretic or dominant limbs. On average, post-stroke participants had larger PCSAs in their  
222 non-paretic limb ( $p = 0.2075$ ; paretic  $12.59 \pm 1.71$   $\text{cm}^2$  95% CI, 8.55 to 16.64  $\text{cm}^2$ ; non-paretic  
223  $13.72 \pm 1.71$   $\text{cm}^2$  95% CI, 9.66 to 17.76  $\text{cm}^2$ ) (Fig 4B). We did not observe interlimb differences  
224 in either volume ( $p = 0.7743$ ; dominant  $125 \pm 40$   $\text{cm}^3$  95% CI, -3 to 253  $\text{cm}^3$ ; non-dominant  $124$   
225  $\pm 40$   $\text{cm}^3$  95% CI, -3 to 253  $\text{cm}^3$ ) or PCSA across limbs ( $p = 0.5561$ ; dominant  $11.38 \pm 3.45$   $\text{cm}^2$   
226 95% CI, 4.60 to 18.16  $\text{cm}^2$ ; non-dominant  $11.52 \pm 3.45$   $\text{cm}^2$  95% CI, 4.74 to 18.29  $\text{cm}^2$ ) in the  
227 participants who had not had a stroke (Fig 4). In the seven stroke participants with smaller  
228 biceps volumes in the paretic limb, normalized interlimb differences in PCSA were smaller than  
229 those in volume due to fewer sarcomeres in series (Fig 5).

230

### 231 **DISCUSSION**

232           This study aimed to quantify *in vivo* differences in muscle architecture parameters  
233 between the paretic and non-paretic biceps brachii of individuals with chronic hemiparetic  
234 stroke. Most notably, this comprehensive, multi-scale study found fewer sarcomeres in series in  
235 the paretic muscle compared to the contralateral side. In 7 of 8 stroke participants, we observed  
236 strikingly smaller muscle volumes on the paretic side. However, the corresponding deficit in  
237 PCSA of the paretic biceps, the architectural parameter that predicts the maximum isometric  
238 force the muscle can generate with full activation(25), was more modest. In these seven stroke  
239 participants, the fact that each had fewer serial sarcomeres partially explains the smaller paretic  
240 muscle volume. We quantified the same architectural parameters in age-range matched  
241 individuals who had not undergone a stroke; we found no substantial or significant interlimb  
242 differences in any muscle architecture parameter, suggesting the interlimb differences we  
243 observed were adaptations associated with chronic stroke rather than natural interlimb  
244 variability. Thus, the architectural parameters suggest a functional re-organization of the  
245 muscle. Specifically, shorter optimal fascicle lengths are generally understood to indicate a  
246 proportional decrease in the width of the muscle's isometric force-length curve<sup>21,24,43</sup>, or – more  
247 explicitly – a proportional decrease in the absolute range of lengths over which the muscle can  
248 generate active force. Given this adaptation in length, the loss of muscle volume we observed in  
249 7 of the 8 paretic limbs was not a direct measure of the loss in the muscle's force-generating  
250 capacity (Fig. 5). The substantial decrease in serial sarcomere number that occurs when a  
251 muscle is held at a joint posture which places it at a shortened length was first reported in  
252 classic limb immobilization studies in animal models(18, 27, 29); it is widely assumed to be a  
253 fundamental muscle adaptation process. We now provide the first direct evidence of this  
254 phenomenon in living human subjects.

255           The most complete demonstration of *in vivo* muscle adaptation that accompanies  
256 chronic length changes has been via animal models involving limb immobilization(18, 27-29).  
257 The main difference between the adaptations observed in our study compared to these studies

258 of limb immobilization is the magnitude of the observed adaptation. The decrease in SSN we  
259 observed in the paretic biceps post stroke was less substantial than the loss of serial  
260 sarcomeres observed following immobilization at a shortened muscle-tendon length in animal  
261 models (~22% vs ~40%). The prime differences between individuals post-stroke and animal  
262 immobilization studies, which may explain this difference in magnitude, is that post-stroke  
263 individuals tend to disuse their paretic limb, but still have active and passive joint motion  
264 whereas animal immobilization studies eliminated movement entirely. In our stroke participants,  
265 the studied muscle also receives altered neural inputs; the animal studies did not involve a  
266 neural injury.

267 In human subjects, only a single previous study has ever measured both sarcomere  
268 lengths and fascicle lengths in the same muscle under conditions that are generally assumed to  
269 result in a loss of serial sarcomeres (i.e., in a muscle that has been chronically placed in a  
270 shortened position)<sup>32</sup>. This previous work evaluated the soleus muscle in children with cerebral  
271 palsy who were undergoing surgery to address equinus contractures. However, because of the  
272 invasive methods required to measure sarcomere lengths before the development of second  
273 harmonic generation microendoscopy, measures of sarcomere length were obtained  
274 intraoperatively. Reasonably, these data could not also be collected from typically developing  
275 children. Thus, despite the valuable data obtained from the clinical population, serial sarcomere  
276 number in the chronically shortened soleus muscle could not be compared to direct measures of  
277 the same parameters obtained in a control population. Despite this limitation, the intraoperative  
278 data provided evidence that the sarcomere lengths in the chronically shortened soleus were  
279 extremely long compared to optimal sarcomere length, even in an extremely plantarflexed limb  
280 posture. This finding was surprising because the results from the immobilization studies in  
281 animal models suggest that muscle “re-optimizes” such that optimal length occurs in the limb  
282 position of immobilization. Importantly, this result in the soleus replicated a previous finding in  
283 children with CP undergoing surgery for wrist contracture. In this case, sarcomere lengths for

284 the wrist flexor in a flexed wrist position were shown to be much longer compared to typically  
285 developing children undergoing surgery to treat radial nerve palsy (3.48 $\mu$ m vs 2.41 $\mu$ m)(50).  
286 Unlike the results in children with CP, we did not observe systematically longer sarcomeres in  
287 the paretic muscles of individuals with chronic hemiparetic stroke (Fig. 2B). We expect that a  
288 critically important difference between muscle adaptation following stroke and CP is that stroke  
289 occurs in a fully developed system. Similar to the biceps brachii in our population, the affected  
290 muscles in the CP studies were chronically in a shortened position due to the primary neural  
291 impairments. However, it has been posited that while chronically shortened CP muscle loses  
292 sarcomeres in series as would be expected from the classic immobilization studies, a  
293 malfunctioning sensing system within the muscles prevents the addition of serial sarcomeres  
294 during bone growth, resulting in the abnormally long sarcomeres(30). Thus, the additional  
295 physiological process of bone growth in children with CP confounds direct comparison with  
296 muscle adaptation that occurs in adults with stroke.

297 In general, our work provides the most direct confirmation in humans to date that chronic  
298 impairments that lead to disuse and place a muscle in a shortened position are associated with  
299 the loss of serial sarcomeres. In the context of the literature discussed above, we note that this  
300 adaptation process also seems to be moderated by the presence of confounding factors (i.e.  
301 bone growth (CP), altered neural input, disuse resulting in a reduced use of available range of  
302 motion, etc.). Such confounds are common *in vivo* following disease, neural injury, and clinical  
303 interventions such as surgery or immobilization. With the comprehensive multiscale imaging  
304 techniques utilized in this study, adaptation of muscle structure in the context of confounding  
305 factors can now be better explored and more fully understood in humans, which is necessary for  
306 the development of more targeted interventions that seek to improve outcomes.

307 The substantial decrease in serial sarcomere number found in the paretic biceps brachii  
308 likely amplifies motor impairments which stem from stroke-induced neural impairment.  
309 Decreased voluntary neural drive (weakness or paresis)(7, 8), increased involuntary neural

310 drive (hypertonicity), and abnormal muscle coactivation patterns(9) occur following damage of  
311 the corticofugal motor pathways due to a stroke. In addition, it is clear that the stroke induced  
312 neural deficits result in altered use of the contralesional or paretic limbs. Particularly notable is  
313 the difficulty (and in severe cases impossibility) of coordinated extension of the upper limb to  
314 reach and grab an object which is some distance from the body(12, 51). In this study we find  
315 that the muscle structure itself has been altered via a loss of serial sarcomeres in the paretic  
316 biceps brachii muscle. Functionally, for the individuals in our study who had survived a stroke,  
317 this means that the paretic muscle has a narrower range of lengths and joint angles over which  
318 it can produce active force. Reduction in serial sarcomeres resulted in an increase in the  
319 muscle's passive resistance to stretch in animal models of limb immobilization(29). For the  
320 biceps, this would exacerbate neurally-driven motor impairments that diminish the ability to  
321 extend the elbow, in the presence of significant elbow extensor weakness, to reach for an object  
322 away from their body.

323         Results from our study are reasonable in the context of previously reported in vivo  
324 studies which independently measure either fascicle length, muscle volume, or sarcomere  
325 length. Specifically, muscle fascicle lengths in the paretic biceps brachii in this study were on  
326 average 20.6% shorter than the non-paretic side. Previous studies performed in elbow flexors  
327 report similar, substantial decreases in fascicle length in extended joint postures (18.6%  
328 decrease in biceps brachii at 25° elbow flexion (46), 15% decrease in brachialis at 10° elbow  
329 flexion(45)). Studies of muscle volume differences between paretic and non-paretic limbs are  
330 variable. On average, our muscle volume differences (29%) are in the same direction (paretic  
331 muscle is smaller) and of slightly greater magnitude than other upper limb studies (no difference  
332 to 25% difference(40, 47)) and lie within the range of lower limb difference (no difference to  
333 33%<sup>35,49</sup>). The exclusion of intramuscular fat in our measure of muscle volume is relatively novel  
334 and may explain our slightly higher percent differences. Measurements of biceps brachii  
335 sarcomere lengths have only been obtained in vivo in a single study that enrolled 4 individuals

336 with chronic hemi-paretic stroke. Although there was not a significant difference in the mean  
337 sarcomere length between limbs among the stroke participants we studied, similar to this  
338 previous work, we found that some individuals had shorter sarcomere lengths in their paretic  
339 limb while others had longer(49). Notably, independently measured muscle anatomical  
340 parameters (particularly sarcomere lengths and non-normalized fascicle lengths) are difficult to  
341 directly compare between studies as they are sensitive to the limb posture chosen for  
342 testing(52); muscle fiber and sarcomere lengths change with joint position.

343         There are various limitations to this study. While it provides novel *in vivo* evidence of  
344 comprehensive muscle architecture changes following chronic hemiparetic stroke, more  
345 participants, a larger number of muscles studied in more joint positions, and inclusion of factors  
346 that quantify the extent participants use their upper limbs (i.e. passive and active range of  
347 motion, elbow joint resting posture, amount of voluntary use of limb, etc.) would broaden our  
348 knowledge of muscle adaptation post brain injury. We would expect that altered tendon  
349 properties or increased tendon length(53) could accompany the paretic muscle adaptation we  
350 observed, but we did not include these measures in this study. This study is limited in that we  
351 did not directly measure stiffness or changes in muscle or tendon properties which may further  
352 elucidate muscle-tendon adaptation post-stroke.

353         Beyond the addition of the first comprehensive measurements of *in vivo* muscle  
354 architecture for the investigation of muscle plasticity to stroke-induced neural deficits, this study  
355 demonstrates the need for such comprehensive *in vivo* studies and provides insight for the  
356 design of therapeutic interventions for stroke survivors. Without the combination of fascicle and  
357 sarcomere lengths measured at the same joint angle with quantification of muscle volume,  
358 ambiguity would remain in the functional impact of these individual muscle parameters. Many  
359 prior studies in stroke and other populations demonstrate interlimb differences in fascicle length  
360 without normalizing to sarcomere length. With the addition of sarcomere length, we were able to  
361 explicitly demonstrate that the paretic biceps brachii muscle has fewer serial sarcomeres. Our

362 finding leads us to conclude that stroke-induced neural deficits, which lead to altered input and  
363 disuse of the contralesional limb, ultimately change the basic biceps brachii muscle architectural  
364 parameters in a way which may amplify functional impairments.

365

## 366 **METHODS**

### 367 **Participants**

368 Measurements of sarcomere length, fascicle length, and muscle volume of the biceps  
369 brachii were obtained using in vivo imaging techniques in both arms of twelve participants; eight  
370 participants with chronic hemiparetic stroke (3 female/5 male,  $60 \pm 9$  yrs, Fugl-Meyer  $26 \pm 9$ ,  $13$   
371  $\pm 10$  yrs post-stroke) and four participants with no history of musculoskeletal or neurological  
372 diseases or injuries to the upper limb (2 female/2 male,  $62 \pm 6$  yrs). Fugl-Meyer Assessment  
373 scores reported in this study were performed by a licensed physical therapist prior to  
374 experimentation. All the individuals who participated in this study provided informed consent  
375 prior to experimentation; Northwestern University's Institutional Review Board approved this  
376 study's procedures.

377

### 378 **Sarcomere length**

379 Sarcomere lengths of both arms were acquired with the participants seated in a comfortable  
380 chair. The arm being imaged was secured at  $85^\circ$  shoulder adduction,  $10^\circ$  horizontal shoulder  
381 flexion,  $25^\circ$  of elbow flexion, mid pro-supination, and  $0^\circ$  wrist and finger flexion (Fig. 6). Joint  
382 posture was verified by goniometric measurement. A microendoscopic system (Zebrascope,  
383 Enspectra Health (previously Zebra Medical Technologies), Mountain View, CA) which consists  
384 of a laser (class IV, output power  $> 500\text{mW}$ , center wavelength  $1030\text{ nm}$ ), microscope, and  
385 microendoscopic probe, was used to image sarcomeres in vivo. This system utilizes the  
386 second-harmonic generation optical technique to capture the intrinsic striation pattern of  
387 sarcomeres(36, 49).

388 A sterile microendoscopic probe was inserted into the long head of the biceps brachii. The  
389 probe consisted of two 1.8cm long, 20-gauge needles with beveled tips (Fig. 6B); one needle  
390 with a transmitting lens used to excite the muscle tissue and one needle housing a receiving  
391 lens to capture the reflection of the signal after it has interacted with tissue. Ultrasound and  
392 palpation techniques were used, prior to insertion, to verify placement of the probe at mid-belly  
393 of the muscle with the probe's optical lenses aligned parallel to the fascicle direction. A spring-  
394 loaded injector was used to rapidly insert the probe, minimizing pain and improving precision of  
395 probe placement. The microscope was attached to the microendoscopic needle for imaging.  
396 Images with a field-of-view of 82 $\mu$ m by 82 $\mu$ m were collected at 1.9Hz for approximately 2-5  
397 minutes. The image produced from the microendoscopic system captures the A-bands (myosin  
398 protein) of the sarcomeres and enables direct measurement of sarcomeres from the resulting  
399 striation pattern(49). Surface EMG (Bagnoli-16 system, Delsys Inc., Boston, MA) of the biceps  
400 brachii was obtained simultaneously using a custom written MATLAB script. Baseline EMG  
401 activity was collected for 10 seconds with the needle inserted and participant relaxed. Muscle  
402 activation was visually monitored during data collection and analysis was performed offline.

403

#### 404 **Fascicle length**

405 Fascicle length measurements of the long head of the biceps brachii in both arms of all  
406 participants were obtained using extended field-of-view ultrasound (EFOV-US) under the same  
407 conditions (same joint posture, passive muscle) as sarcomere length measures. The extended  
408 field-of-view technique involves sweeping the ultrasound probe along the length of the muscle  
409 as sequential B-mode ultrasound images are acquired and stitched together to form a single  
410 composite image with a field-of-view longer than the ultrasound probe's aperture ( $\pm 60$  cm)(54).  
411 This method has been demonstrated to be accurate and reliable for measurement of fascicle  
412 length in different individuals and muscles(52, 55). Approximately 10 qualitatively good images



413 were captured per arm. EFOV-US images (Acuson S2000, linear array transducer 18L6,  
414 SieScape, Siemens Medical Solutions USA, Inc., Mountain View, CA) and surface EMG  
415 (Bagnoli-16 system, Delsys Inc., Boston, MA) of the biceps brachii were simultaneously  
416 recorded (Spike, Power1401, and Micro1401-3, Cambridge Electronic Design Limited,  
417 Cambridge, England).

418

## 419 **Muscle Volume**

420 To determine the volume of the biceps brachii muscle, excluding intramuscular fat, the  
421 Dixon method, a fat suppression MRI sequence, was implemented on both upper limbs of all  
422 participants (3D GRE, TR = 7ms, flip angle = 12°, matrix size = 256 x 304, slice thickness =  
423 3mm, TE of 2.45ms and 3.68ms)(47). As increases in intramuscular fat within muscle has been  
424 demonstrated in the lower limb of stroke participants(41) and patients with other pathologies (i.e  
425 whiplash(56), spinal cord injury(57)) correcting muscle volumes for the amount of intramuscular  
426 fat is necessary to avoid potential overestimation of volume of muscle. The participants were  
427 lying supine in a 3T MRI (Area, Siemens Medical Solutions USA, Inc., Mountain View, CA)  
428 scanner with their arm as close to the center of the scanner as possible. To minimize participant  
429 movement during scanning, the lower arm was splinted using an orthosis.

430

## 431 **Data analysis**

### 432 *Sarcomere length*

433 Image sequences obtained from the microendoscopic system were post-processed  
434 offline using a script provided with the ZebraScope by Enspectra Health (previously Zebra  
435 Medical Technologies, Mountain View, CA). With this script, the raw image sequence was first  
436 combined into a multipage Tiff. Then, a Fast Fourier Transform (FFT) cleared the edges and  
437 vertical center which contained only noise; the transformed data were symmetrically, low pass,  
438 Gaussian filtered. Within the script, we set the frequency bounds to filter out all frequencies

439 which would yield unphysiologic sarcomere length values, specifically, values smaller than 2 $\mu$ m  
440 or larger than 5 $\mu$ m. This removed all images without sarcomeres (without frequencies in the 2-5  
441  $\mu$ m range) from the multipage Tiff sequence. White noise in the FFT was calculated and  
442 removed. To determine mean sarcomere length from each processed image, the peak  
443 frequency of a least squares fit of a Gaussian was calculated. The final outputs of the image  
444 processing script for each arm and each participant were mean sarcomere length and standard  
445 deviation, calculated using all processed images that were not excluded by the specified  
446 frequency bounds. At this point, we used our own custom-written MATLAB code to further  
447 exclude images that were collected when the biceps EMG signal was 3 standard deviations  
448 above the resting baseline EMG. Thus, the mean sarcomere lengths and standard deviations  
449 that we report for each biceps brachii were calculated from the processed image data, further  
450 restricted by the synced EMG data to only include images that were collected under passive  
451 conditions.

452

#### 453 *Fascicle Length*

454 EFOV-US images were exported as DICOM images and measurements of fascicle  
455 length were made offline using the segmented line tool in ImageJ (ImageJ with Fiji, version  
456 1.51h, Wayne Rasband, National Institutes of Health, Bethesda, MD(58)). Measurements were  
457 made on 3 images per arm per participant. The experimenter selected the 3 images which best  
458 captured the entire muscle and had visible fascicles which extended from central tendon to  
459 aponeurosis. Four fascicles were measured per image. Mean fascicle length was calculated  
460 across the 3 images (3 images X 4 fascicles per image = 12 fascicles)(46, 52).

461

#### 462 *Muscle Volume*

463 Manual segmentation of the biceps brachii (long and short head) muscle was performed  
464 using Analyze12.0 (AnalyzeDirect, Overland Park, KS). To calculate the volume of muscle  
465 without intramuscular fat ( $V_{m-f}$ ), the following equations were implemented:

$$(1) \% Fat = \frac{\text{intensity of fat}}{\text{intensity of water} + \text{intensity of fat}}$$

$$(2) V_{\text{intramuscular fat}} = V_{\text{total}} * \% Fat$$

$$(3) V_{m-f} = V_{\text{total}} - V_{\text{intramuscular fat}}$$

466 Where  $V_{\text{total}}$  is the total volume segmented from the MRI images. Measurements of biceps  
467 muscle volume without fat were made by two different raters (rater 1 n = 7, rater 2 n=5).  
468 Segmentation and calculation of muscle volume without intramuscular fat ( $V_{m-f}$ ) has been  
469 shown to be reliable within and across raters(47).

470

#### 471 **Calculation of Functional Parameters**

472 With the quantification of sarcomere length, fascicle length, and muscle volume, optimal  
473 fascicle length ( $OFL$ ), serial sarcomere number (SSN), and physiological cross-sectional area  
474 (PCSA), were calculated for both arms of all participants using the following equations.

$$(4) SSN = \frac{l^F}{l^S}$$

$$(5) OFL = SSN * l_o^S$$

$$(6) PCSA = \frac{V_{m-f}}{OFL}$$

475 Where  $l_o^S$  is  $2.7\mu m$  or optimal sarcomere length(33), and  $l^F$  (fascicle length),  $l^S$  (sarcomere  
476 length), and  $V_{m-f}$  (volume of muscle without fat infiltration) were measured in this study. For  
477 statistical analysis involving equations (4-6), average fascicle length and all measures of  
478 sarcomere length were utilized.

479

## 480 **Statistical Analysis**

481 To determine if there were significant interlimb differences in any of the muscle  
482 architecture parameters or calculations, generalized linear mixed-effects models were  
483 implemented (SAS 9.4, SAS Institute Inc., Cary, NC). Each model had one of the parameters or  
484 calculations as the outcome variable. Whether or not the participant had a stroke was a fixed  
485 effect in the model. Within-subject correlation and the correlation between paretic and non-  
486 paretic (or dominant non-dominant) arms were modeled as random effects. A significant  
487 difference between limbs was present if the p-value was less than 0.05 for all models. To  
488 determine if there is a linear relationship between the percent difference in SSN or OFL in the  
489 participants studied with stroke and their clinical function score (Fugl-Meyer assessment), a  
490 linear regression was performed.

491 An a priori power analysis was conducted to determine sufficient sample size to test the  
492 hypothesis that participants with stroke have interlimb differences in optimal fascicle length  
493 which are not present in individuals who have not had a stroke. The analysis indicated that with  
494 8 participants with stroke and 4 participants without stroke and an effect size greater of 1.85, a  
495 power greater than 0.8 would be achieved. This effect size was established from interlimb  
496 differences in fascicle and sarcomere length obtained from two previous studies performed on  
497 different sets of individuals(46, 49). The effect size from our data was verified to exceed the  
498 effect size from the a priori analysis.

499

## 500 **AKNOWLEDGEMENTS**

501 We would like to thank the study participants, Vikram Darbhe for assistance in data collection,  
502 and Dr. Masha Kocherginsky and Liqi Chen for aid with statistical analysis. We would also like  
503 to thank Sabeen Adamani for assistance in equipment set up and troubleshooting and Zebra  
504 Medical Technologies (now Enspectra Health) for their support with data collection and image  
505 processing. This work is supported by the National Science Foundation (NSF) Graduate

506 Research Fellowship Program under Grant No. DGE-1324585, as well as National Institutes of  
507 Health (NIH) R01 D084009. Any opinions, findings, and conclusions or recommendations  
508 expressed in this material are those of the authors and do not necessarily reflect the views of  
509 the NSF or NIH.

510

## 511 **REFERENCES**

- 512 1. Benjamin EJ, Muntner P, & Bittencourt MS (2019) Heart disease and stroke statistics-2019  
513 update: a report from the American Heart Association. *Circulation* 139(10):e56-e528.
- 514 2. Faria-Fortini I, Michaelsen SM, Cassiano JG, & Teixeira-Salmela LF (2011) Upper extremity  
515 function in stroke subjects: relationships between the international classification of functioning,  
516 disability, and health domains. *Journal of Hand Therapy* 24(3):257-265.
- 517 3. Ellis MD, Drogos J, Carmona C, Keller T, & Dewald JP (2012) Neck rotation modulates flexion  
518 synergy torques, indicating an ipsilateral reticulospinal source for impairment in stroke. *Journal*  
519 *of neurophysiology* 108(11):3096-3104.
- 520 4. Zaaimi B, Edgley SA, Soteropoulos DS, & Baker SN (2012) Changes in descending motor pathway  
521 connectivity after corticospinal tract lesion in macaque monkey. *Brain* 135(7):2277-2289.
- 522 5. Karbasforoushan H, Cohen-Adad J, & Dewald JPA (2019) Brainstem and spinal cord MRI  
523 identifies altered sensorimotor pathways post-stroke. *Nature Communications* 10(1):3524.
- 524 6. McPherson JG, *et al.* (2018) Progressive recruitment of contralesional cortico-reticulospinal  
525 pathways drives motor impairment post stroke. *The Journal of Physiology* 596(7):1211-1225.
- 526 7. Bourbonnais D & Noven SV (1989) Weakness in patients with hemiparesis. *American Journal of*  
527 *Occupational Therapy* 43(5):313-319.
- 528 8. Carin-Levy G, *et al.* (2006) Longitudinal changes in muscle strength and mass after acute stroke.  
529 *Cerebrovascular Diseases* 21(3):201-207.
- 530 9. Dewald JP, Pope PS, Given JD, Buchanan TS, & Rymer WZ (1995) Abnormal muscle coactivation  
531 patterns during isometric torque generation at the elbow and shoulder in hemiparetic subjects.  
532 *Brain* 118(2):495-510.
- 533 10. Brunnstrom S (1970) *Movement Therapy in Hemiplegia: A Neurophysiological Approach*. (Harper  
534 & Row, New York, NY) 1st Ed.
- 535 11. Miller LC & Dewald JPA (2012) Involuntary paretic wrist/finger flexion forces and EMG increase  
536 with shoulder abduction load in individuals with chronic stroke. *Clinical Neurophysiology*  
537 123(6):1216-1225.
- 538 12. Sukal TM, Ellis MD, & Dewald JP (2007) Shoulder abduction-induced reductions in reaching work  
539 area following hemiparetic stroke: neuroscientific implications. *Experimental brain research*  
540 183(2):215-223.
- 541 13. Boakes JL, Foran J, Ward SR, & Lieber RL (2007) CASE REPORT: Muscle Adaptation by Serial  
542 Sarcomere Addition 1 Year after Femoral Lengthening. *Clinical orthopaedics and related*  
543 *research* 456:250-253.
- 544 14. Csapo R, Maganaris C, Seynnes O, & Narici M (2010) On muscle, tendon and high heels. *Journal*  
545 *of Experimental Biology* 213(15):2582-2588.
- 546 15. Eisenberg BR, Brown JM, & Salmons S (1984) Restoration of fast muscle characteristics following  
547 cessation of chronic stimulation. *Cell and tissue research* 238(2):221-230.

- 548 16. Kernell D, Donselaar Y, & Eerbeek O (1987) Effects of physiological amounts of high-and low-rate  
549 chronic stimulation on fast-twitch muscle of the cat hindlimb. II. Endurance-related properties.  
550 *Journal of neurophysiology* 58(3):614-627.
- 551 17. Kernell D, Eerbeek O, Verhey B, & Donselaar Y (1987) Effects of physiological amounts of high-  
552 and low-rate chronic stimulation on fast-twitch muscle of the cat hindlimb. I. Speed-and force-  
553 related properties. *Journal of neurophysiology* 58(3):598-613.
- 554 18. Williams PE & Goldspink G (1973) The effect of immobilization on the longitudinal growth of  
555 striated muscle fibres. *Journal Of Anatomy* 116(Pt 1):45.
- 556 19. Thomason D, Herrick R, Surdyka D, & Baldwin K (1987) Time course of soleus muscle myosin  
557 expression during hindlimb suspension and recovery. *Journal of applied physiology* 63(1):130-  
558 137.
- 559 20. Gans C & Bock WJ (1965) The functional significance of muscle architecture: a theoretical  
560 analysis. *Adv Anat Embryol Cell Biol* 38:115-142.
- 561 21. Lieber RL & Fridén J (2000) Functional and clinical significance of skeletal muscle architecture.  
562 *Muscle & Nerve: Official Journal of the American Association of Electrodiagnostic Medicine*  
563 23(11):1647-1666.
- 564 22. Gans C (1982) Fiber architecture and muscle function. *Exercise and Sports Sciences Reviews*  
565 10:160-207.
- 566 23. Sacks RD & Roy RR (1982) Architecture of the hind limb muscles of cats: Functional significance.  
567 *Journal of Morphology* 173(2):185-195.
- 568 24. Zajac FE (1989) Muscle and tendon: properties, models, scaling, and application to biomechanics  
569 and motor control. *Critical reviews in biomedical engineering* 17(4):359-411.
- 570 25. Powell PL, Roy RR, Kanim P, Bello MA, & Edgerton VR (1984) Predictability of skeletal muscle  
571 tension from architectural determinations in guinea pig hindlimbs. *Journal of Applied Physiology*  
572 57(6):1715-1721.
- 573 26. Murray WM, Buchanan TS, & Delp SL (2000) The isometric functional capacity of muscles that  
574 cross the elbow. *J. Biomech.* 33(8):943-952.
- 575 27. Williams PE & Goldspink G (1978) Changes in sarcomere length and physiological properties in  
576 immobilized muscle. *Journal of Anatomy* 127(Pt 3):459-468.
- 577 28. Williams PE & Goldspink G (1971) Longitudinal growth of striated muscle fibres. *Journal of cell*  
578 *science* 9(3):751-767.
- 579 29. Tabary J, Tabary C, Tardieu C, Tardieu G, & Goldspink G (1972) Physiological and structural  
580 changes in the cat's soleus muscle due to immobilization at different lengths by plaster casts.  
581 *The Journal of physiology* 224(1):231.
- 582 30. Lieber RL & Fridén J (2019) Muscle contracture and passive mechanics in cerebral palsy. *Journal*  
583 *of Applied Physiology* 126(5):1492-1501.
- 584 31. Mathewson MA & Lieber RL (2015) Pathophysiology of muscle contractures in cerebral palsy.  
585 *Physical Medicine and Rehabilitation Clinics* 26(1):57-67.
- 586 32. Mathewson MA, Ward SR, Chambers HG, & Lieber RL (2015) High resolution muscle  
587 measurements provide insights into equinus contractures in patients with cerebral palsy.  
588 *Journal of Orthopaedic Research* 33(1):33-39.
- 589 33. Gordon A, Huxley AF, & Julian F (1966) The variation in isometric tension with sarcomere length  
590 in vertebrate muscle fibres. *The Journal of physiology* 184(1):170-192.
- 591 34. Lieber RL, Murray WM, Clark DL, Hentz VR, & Fridén J (2005) Biomechanical properties of the  
592 brachioradialis muscle: Implications for surgical tendon transfer. *The Journal of Hand Surgery*  
593 30(2):273-282.
- 594 35. Murray WM, Hentz VR, Fridén J, & Lieber RL (2006) Variability in Surgical Technique for  
595 Brachioradialis Tendon Transfer: Evidence and Implications. *JBJS* 88(9):2009-2016.



- 596 36. Llewellyn ME, Barretto RPJ, Delp SL, & Schnitzer MJ (2008) Minimally invasive high-speed  
597 imaging of sarcomere contractile dynamics in mice and humans. *Nature* 454(7205):784-788.
- 598 37. Sanchez Gabriel N, *et al.* (2015) In Vivo Imaging of Human Sarcomere Twitch Dynamics in  
599 Individual Motor Units. *Neuron* 88(6):1109-1120.
- 600 38. Gao F & Zhang L-Q (2008) Altered contractile properties of the gastrocnemius muscle  
601 poststroke. *Journal of Applied Physiology* 105(6):1802-1808.
- 602 39. Ramsay JW, Buchanan TS, & Higginson JS (2014) Differences in Plantar Flexor Fascicle Length  
603 and Pennation Angle between Healthy and Poststroke Individuals and Implications for  
604 Poststroke Plantar Flexor Force Contributions. *Stroke Res Treat* 2014:919486-919486.
- 605 40. English C, McLennan H, Thoires K, Coates A, & Bernhardt J (2010) Loss of Skeletal Muscle Mass  
606 after Stroke: a Systematic Review. *International Journal of Stroke* 5(5):395-402.
- 607 41. Ramsay JW, Barrance PJ, Buchanan TS, & Higginson JS (2011) Paretic muscle atrophy and non-  
608 contractile tissue content in individual muscles of the post-stroke lower extremity. *Journal of*  
609 *biomechanics* 44(16):2741-2746.
- 610 42. Metoki N, Sato Y, Satoh K, Okumura K, & Iwamoto J (2003) Muscular atrophy in the hemiplegic  
611 thigh in patients after stroke. *American journal of physical medicine & rehabilitation* 82(11):862-  
612 865.
- 613 43. Zajac FE (1992) How musculotendon architecture and joint geometry affect the capacity of  
614 muscles to move and exert force on objects: a review with application to arm and forearm  
615 tendon transfer design. *The Journal of hand surgery* 17(5):799-804.
- 616 44. Ryan AS, Dobrovolsky CL, Smith GV, Silver KH, & Macko RF (2002) Hemiparetic muscle atrophy  
617 and increased intramuscular fat in stroke patients. *Archives of physical medicine and*  
618 *rehabilitation* 83(12):1703-1707.
- 619 45. Li L, Tong KY, & Hu X (2007) The Effect of Poststroke Impairments on Brachialis Muscle  
620 Architecture as Measured by Ultrasound. *Arch Phys Med Rehabil* 88:243-250.
- 621 46. Nelson CM, Murray WM, & Dewald JPA (2018) Motor Impairment–Related Alterations in Biceps  
622 and Triceps Brachii Fascicle Lengths in Chronic Hemiparetic Stroke. *Neurorehabilitation and*  
623 *Neural Repair* 32(9):799-809.
- 624 47. Garmirian LRP, Acosta AM, Schmid R, & Dewald JPA (2019) Volume and intramuscular fat  
625 content of upper extremity muscles in individuals with chronic hemiparetic stroke.  
626 *bioRxiv*:687699.
- 627 48. Bhadane MY, Gao F, Francisco GE, Zhou P, & Li S (2015) Correlation of resting elbow angle with  
628 spasticity in chronic stroke survivors. *Frontiers in neurology* 6:183.
- 629 49. Sanchez Gabriel N, *et al.* (2015) In Vivo Imaging of Human Sarcomere Twitch Dynamics in  
630 Individual Motor Units. *Neuron* 88(6):1109-1120.
- 631 50. Lieber RL & Fridén J (2002) Spasticity causes a fundamental rearrangement of muscle–joint  
632 interaction. *Muscle & Nerve* 25(2):265-270.
- 633 51. Lan Y, Yao J, & Dewald JPA (2017) The Impact of Shoulder Abduction Loading on Volitional Hand  
634 Opening and Grasping in Chronic Hemiparetic Stroke. *Neurorehabilitation and neural repair*  
635 31(6):521-529.
- 636 52. Nelson CM, Dewald JPA, & Murray WM (2016) In vivo measurements of biceps brachii and  
637 triceps brachii fascicle lengths using extended field-of-view ultrasound. *J. Biomech.* 49:1948-  
638 1952.
- 639 53. Takahashi M, Ward SR, Marchuk LL, Frank CB, & Lieber RL (2010) Asynchronous muscle and  
640 tendon adaptation after surgical tensioning procedures. *J Bone Joint Surg Am* 92(3):664-674.
- 641 54. Weng L, *et al.* (1997) US extended-field-of-view imaging technology. *Radiology* 203(3):877-880.

- 642 55. Adkins AN, Franks PW, & Murray WM (2017) Demonstration of extended field-of-view  
643 ultrasound's potential to increase the pool of muscles for which in vivo fascicle length is  
644 measurable. *Journal of biomechanics* 63:179-185.
- 645 56. Elliott JM, *et al.* (2010) Magnetic Resonance Imaging Findings of Fatty Infiltrate in the Cervical  
646 Flexors in Chronic Whiplash. *Spine* 35(9):948-954.
- 647 57. Elder CP, Apple DF, Bickel CS, Meyer RA, & Dudley GA (2004) Intramuscular fat and glucose  
648 tolerance after spinal cord injury – a cross-sectional study. *Spinal Cord* 42(12):711-716.
- 649 58. Schindelin J, *et al.* (2012) Fiji: an open-source platform for biological-image analysis. *Nature*  
650 *methods* 9(7):676-682.

651

652

653

## 654 **FIGURE LEGENDS**

655 **Figure 1: Serial Sarcomere Number/ Optimal Fascicle Length.** Data showing interlimb  
656 differences in serial sarcomere number and, proportionally, optimal fascicle length for all  
657 participants who had a stroke and the age-range matched controls (no stroke). Each participant  
658 is represented by a different shape/color and each individual's limbs are connected by a line.  
659 Black circular points and error bars which are offset from individual participant data, represent  
660 mean and standard deviations estimated from the generalized mixed effects model. The star (\*)  
661 indicates a significant interlimb difference ( $p < 0.05$ ).

662

663 **Figure 2: Fascicle and Sarcomere Length.** Graphs displaying mean sarcomere length (A) and  
664 fascicle length (B) measurements from both limbs and in all participants in the stroke and  
665 control (no-stroke) group. Each participant is represented by a different shape and or color.  
666 Each individual's limbs are connected by a solid line with the exception of one healthy individual  
667 whom had the same average sarcomere length on both limbs as another healthy individual  
668 (dashed line to enable visualization of both healthy individuals). Black circular points and error  
669 bars which are offset from individual participant data, represent mean and standard deviations



670 estimated from the generalized mixed effects model. The star (\*) indicates a significant interlimb  
671 difference ( $p < 0.05$ ).

672

673 **Figure 3: Relationship between change in muscle parameters and clinical assessment.**

674 Graphs showing the relationship between percent difference in serial sarcomere number (A)  
675 and percent difference in fascicle length (B) versus the Fugl-Meyer Assessment clinical  
676 impairment score. There is a trend toward a greater difference in OFL as the impairment level  
677 increases (Fugl-Meyer becomes smaller number).

678

679 **Figure 4: Muscle Volume and PCSA.** Data for muscle volume with intramuscular fat removed

680 (A) and calculated PCSA (B) for both biceps brachii of all participants who had a stroke and the  
681 age matched controls (no stroke). Each participant is represented by a different shape and or  
682 color and each individual's limbs are connected by a solid line. Black circular points and error  
683 bars which are offset from individual participant data, represent mean and standard deviations  
684 estimated from the generalized mixed effects model. The star (\*) indicates a significant interlimb  
685 difference ( $p < 0.05$ ).

686

687 **Figure 5: Interlimb Muscle Differences Post-Stroke.** Bar graph showing the percent

688 difference in muscle architectural (sarcomere length "SL" and muscle volume "MV") and  
689 functional parameters (serial sarcomere number "SSN" and physiological cross sectional area  
690 "PCSA") estimated from the general linear mixed-effects model for all stroke participants who  
691 had smaller muscle volume on the paretic biceps. A positive percent difference indicates that  
692 the paretic parameter is smaller than the non-paretic side. Error bars represent one standard  
693 deviation from the mean of the percent difference across the subjects.

694

695 **Figure 6: Illustration of experimental set up for muscle architecture measures. A.** Arm  
696 posture used for measurement of fascicle length using ultrasound (right) and for sarcomere  
697 length (see B). The white dashed line overlaid on the ultrasound image demonstrates a muscle  
698 fascicle. **B.** The illustration shows the Zebrascope which utilizes second harmonic generation  
699 microendoscopy to capture the natural striation pattern of sarcomeres in vivo. The Biodex chair  
700 and arm fixture (middle) used for measurement of sarcomere and fascicle lengths (see A). The  
701 microscope is blown up on the left (Blue dotted box) to show the flow of laser light through the  
702 microscope (orange arrows). Below the microscope is a graphic of the probe which is inserted  
703 into the bicep brachii muscle. Between the two needles of the probe at 1.5cm the laser light  
704 interacts with myofibrils and the striation pattern of the sarcomeres can be captured. To the  
705 right, a raw image which would be seen during image collection is shown. After post-processing,  
706 sarcomere length is measured from the processed image which is showing the length of 10  
707 sarcomeres in series (white line). **C.** Participant in the supine positioning (left) in the MRI bore.  
708 Orange inset shows the splinting of the arm to reduce artifacts due to hand and arm movement.  
709 (Right) 3D rendering of the biceps brachii muscle and humerus bone with a single MRI slice  
710 superimposed.

711

## 712 **FIGURES AND TABLES**

713 Figure 1:

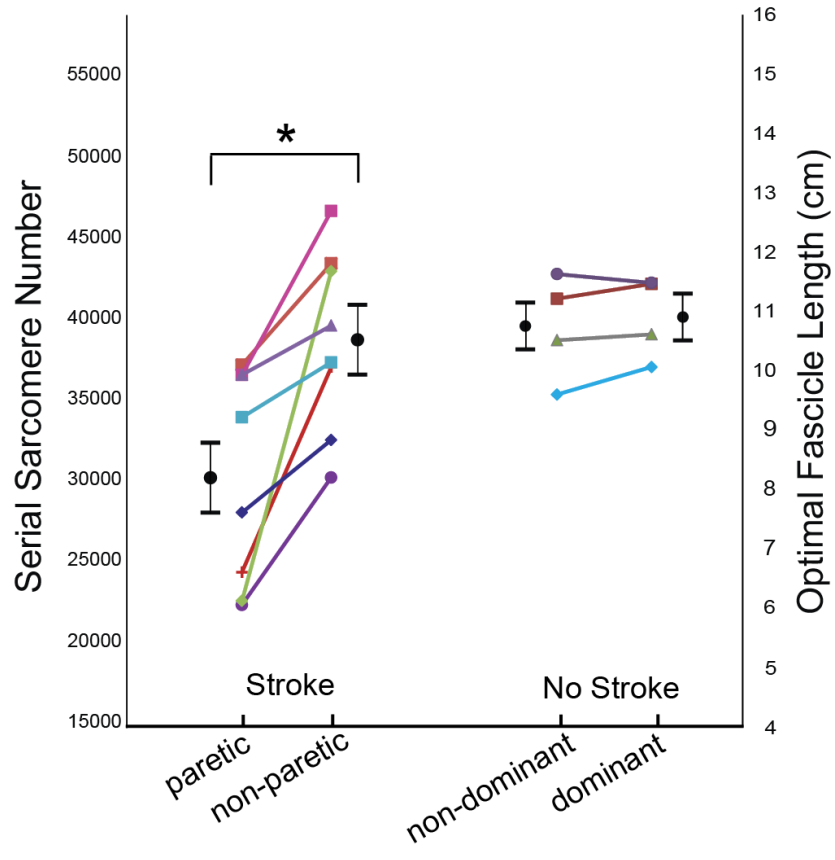

714

715

716 Figure 2

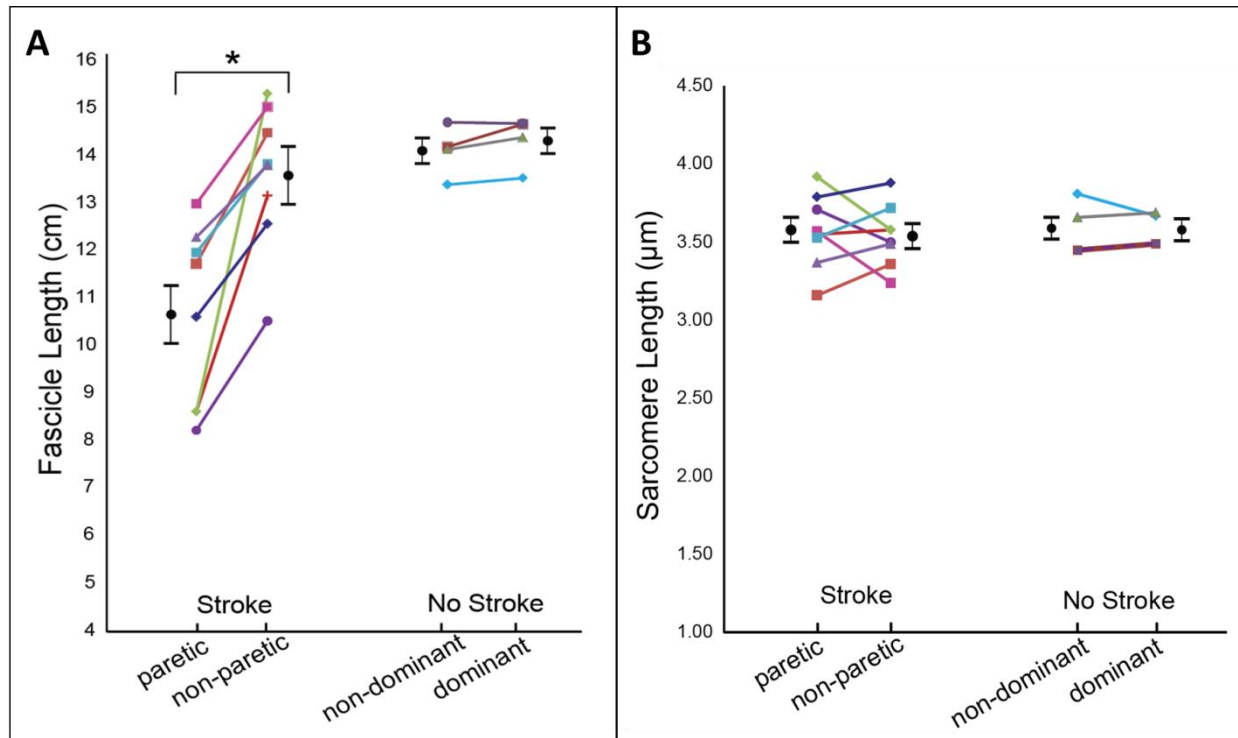

717

718 Figure 3

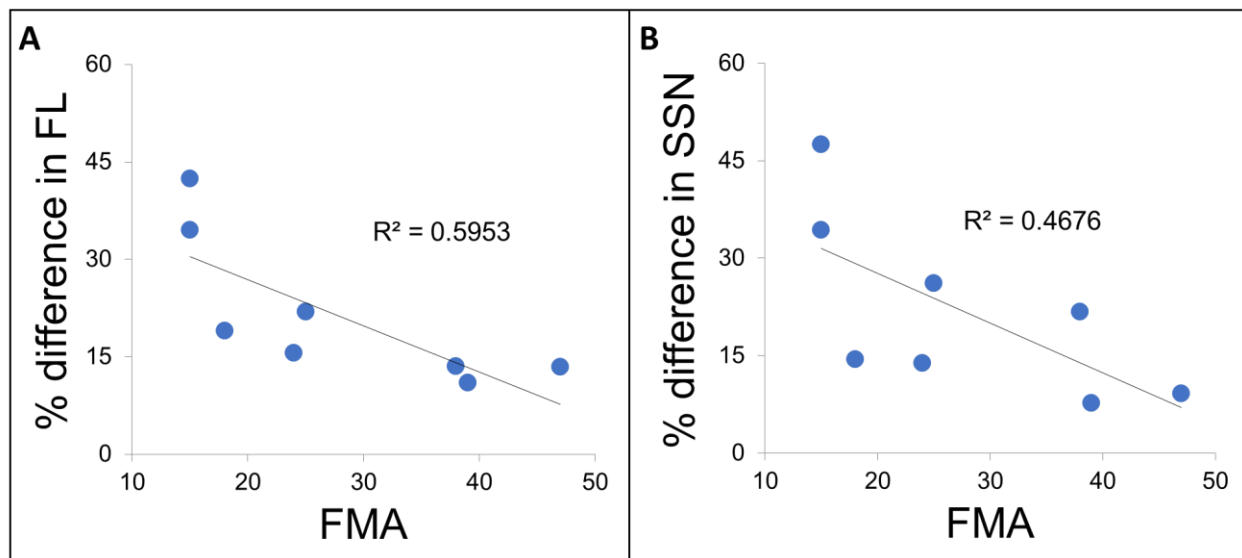

719

720

721

722

723 Figure 4

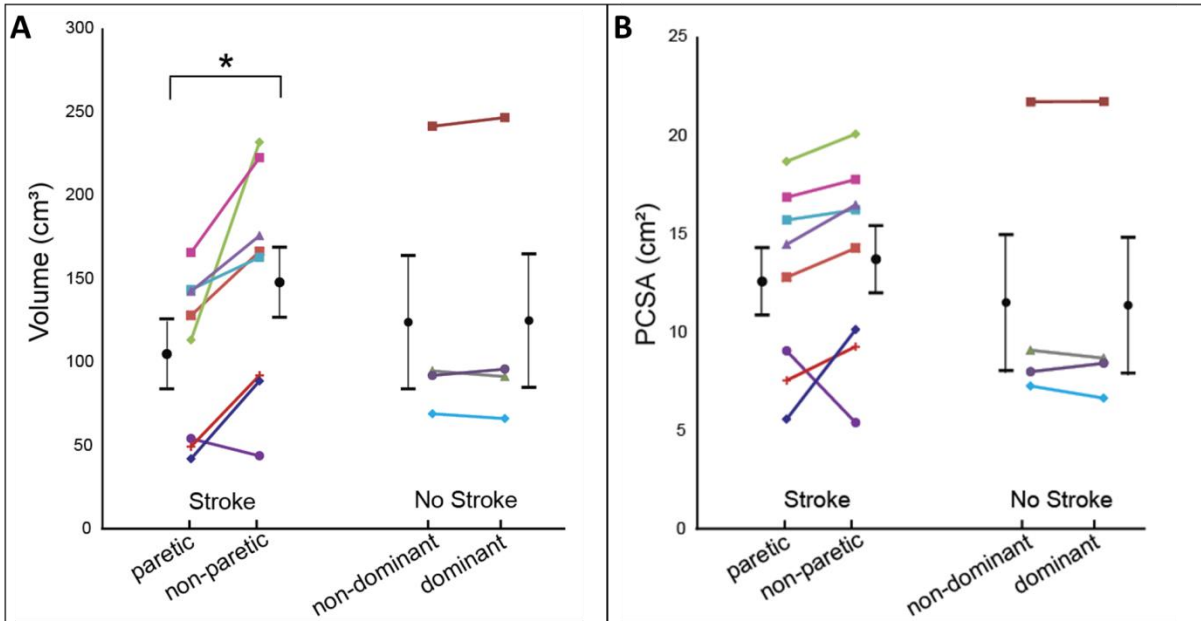

724

725 Figure 5

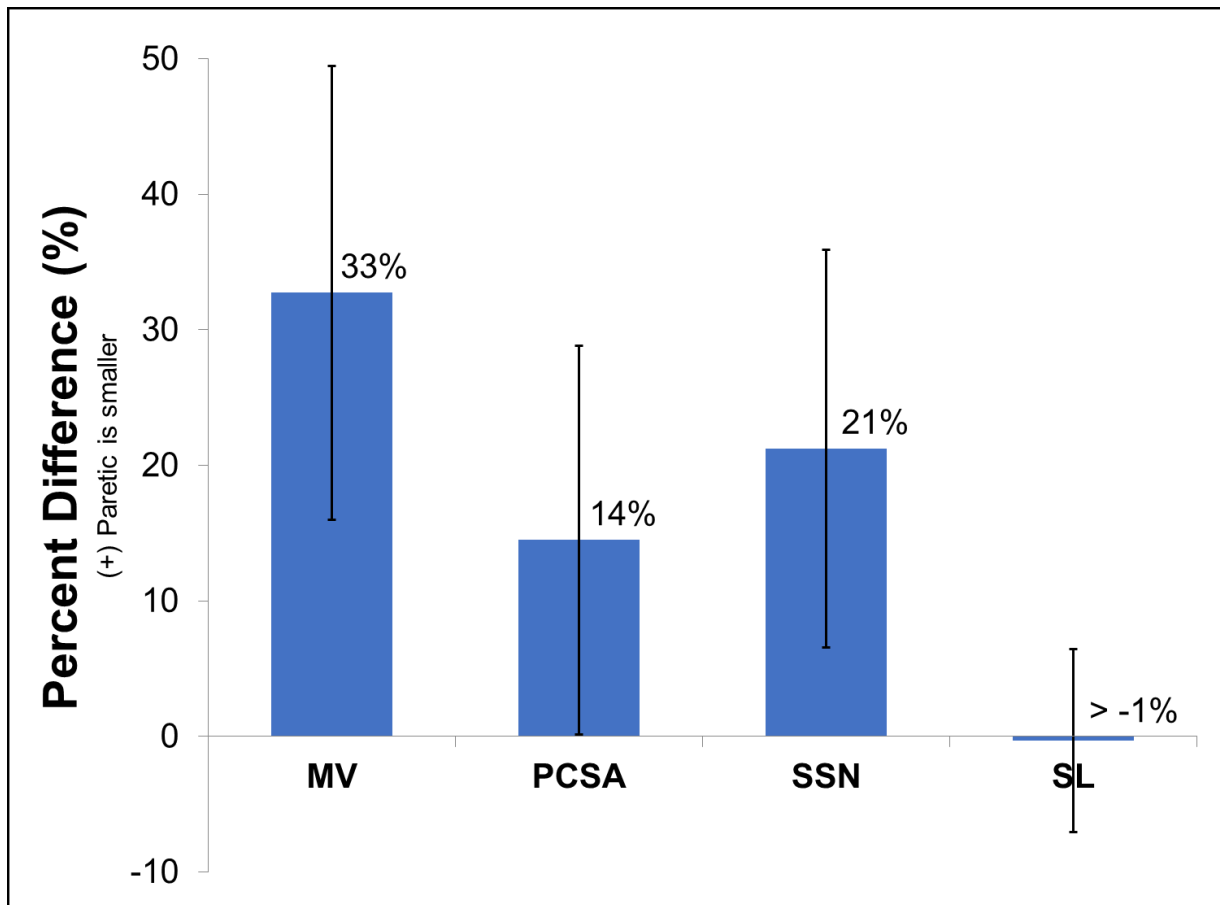

726

727 Figure 6

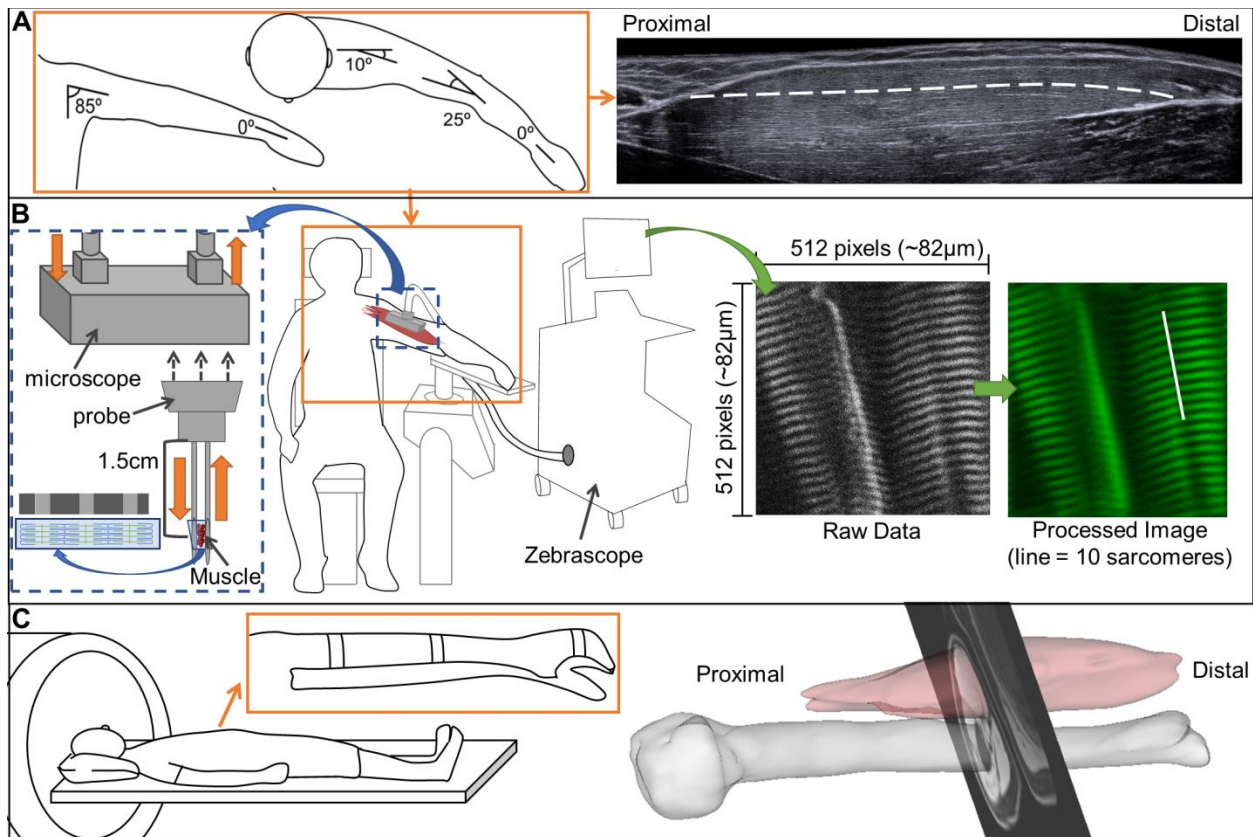

728

729

730

731

732

733

734

735

736

737

738

739

740

741 **Table 1:** Demographic information of individuals who participated in this study.

|    | Gender | Age* | Paretic  | Years Post Stroke* | FMA |
|----|--------|------|----------|--------------------|-----|
| 1  | F      | 65   | R        | 32                 | 25  |
| 2  | F      | 65   | R        | 11                 | 15  |
| 3  | F      | 63   | L        | 15                 | 24  |
| 4  | M      | 48   | L        | 8                  | 18  |
| 5  | M      | 60   | R        | 7                  | 15  |
| 6  | M      | 72   | R        | 22                 | 38  |
| 7  | M      | 62   | L        | 5                  | 47  |
| 8  | M      | 44   | R        | 5                  | 39  |
|    | Gender | Age* | Dominant |                    |     |
| 9  | F      | 53   | R        |                    |     |
| 10 | F      | 64   | R        |                    |     |
| 11 | M      | 62   | R        |                    |     |
| 12 | M      | 67   | R        |                    |     |

742

743 \*Age for all participants and years post-stroke for participants with stroke (Subjects 1-8) are  
744 reported as of the time at which the experimental data collection for that participant was  
745 completed.
